# Supplementary material
Source: Springer Nature journal article supplement (https://www.springermedizin.de/resource/supplementary/13012_2006_44_MOESM1_ESM.pdf/9629126)
Supplement: MOESM1 [file 9629126]

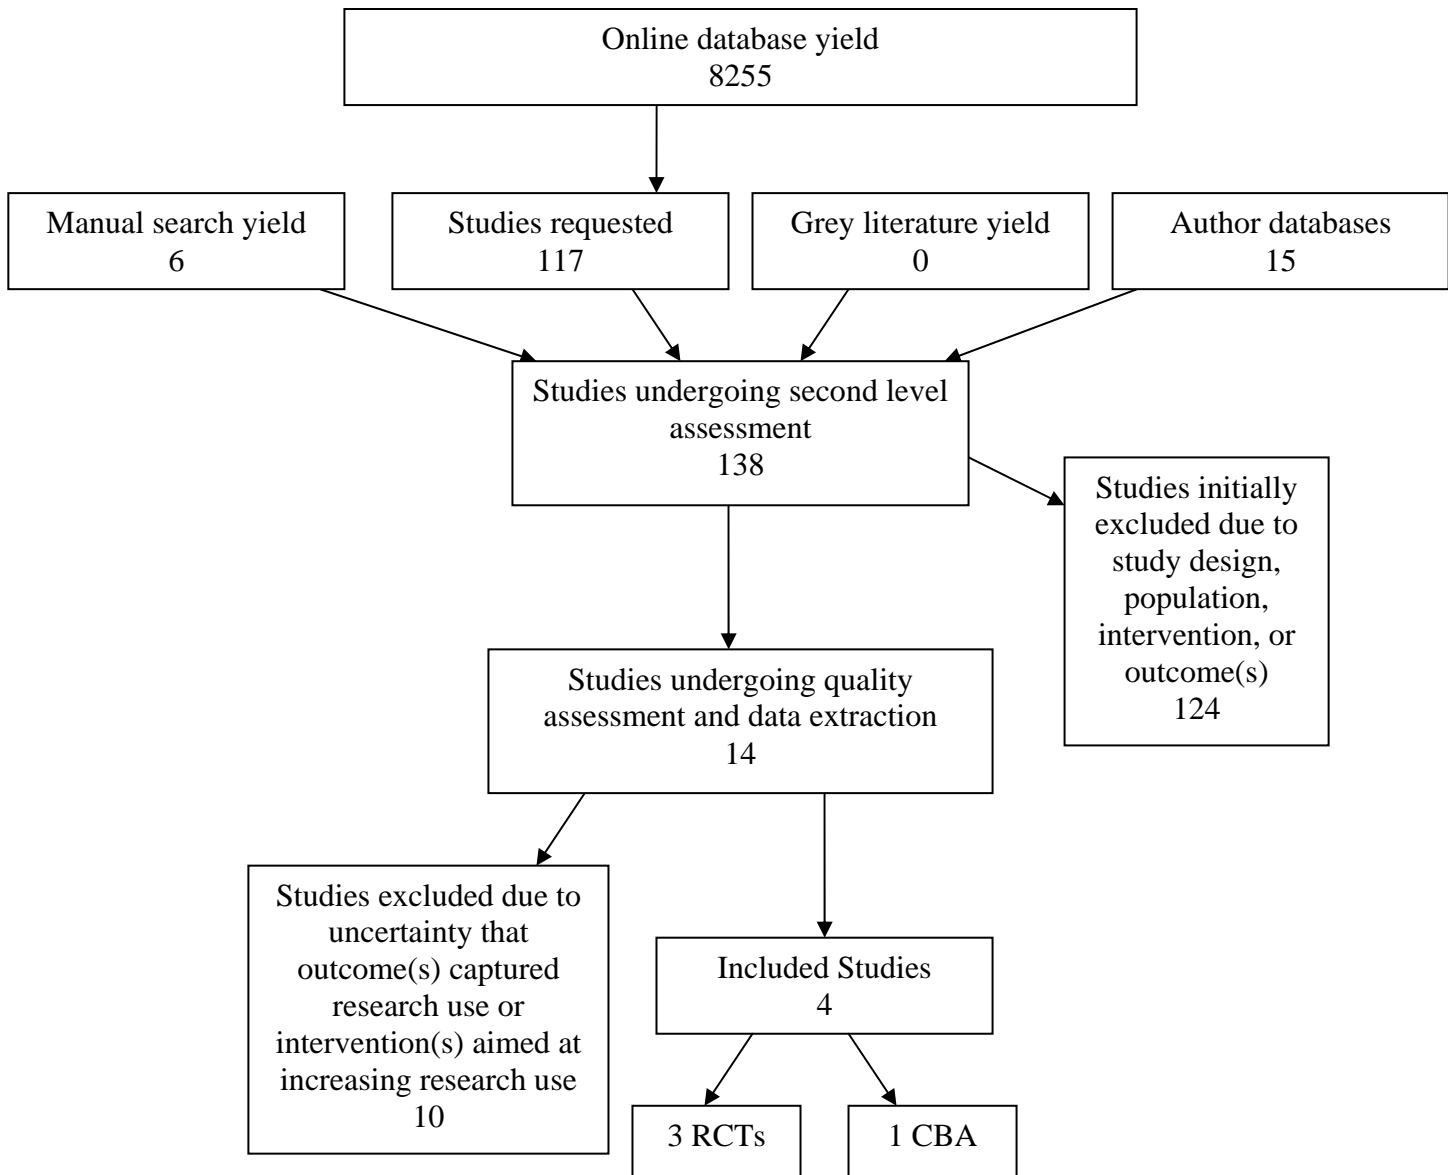

Online database yield  
8255

Manual search yield  
6

Studies requested  
117

Grey literature yield  
0

Author databases  
15

Studies undergoing second level  
assessment  
138

Studies initially  
excluded due to  
study design,  
population,  
intervention, or  
outcome(s)  
124

Studies undergoing quality  
assessment and data extraction  
14

Studies excluded due to  
uncertainty that  
outcome(s) captured  
research use or  
intervention(s) aimed at  
increasing research use  
10

Included Studies  
4

3 RCTs

1 CBA
